# Supplementary material for: Phosphorus-triggered synergy of phase transformation and chalcogenide vacancy migration in cobalt sulfide for an efficient oxygen evolution reaction
Source: Royal Society of Chemistry journal article supplement (doi:10.1039/c9nr09203j), 2020-01-01
Supplement: c9nr09203j1.pdf [file c9nr09203j1.pdf]

# Supporting Information

## **Phosphorus-triggered synergy of phase transformation and chalcogenide vacancy migration in cobalt sulfide for efficient oxygen evolution reaction**

Suli Liu,<sup>\*a</sup> Chenjing Che,<sup>a</sup> Haiyan Jing,<sup>a</sup> Jun Zhao,<sup>a</sup> Xueqin Mu,<sup>a</sup> Sudi Zhang,<sup>a</sup> Changyun Chen<sup>a</sup> and Shichun Mu<sup>\*b</sup>

<sup>a</sup>Key Laboratory of Advanced Functional Materials of Nanjing, Nanjing Xiaozhuang University, Nanjing 211171, China. E-mail: niuniu\_410@126.com.

<sup>b</sup>State Key Laboratory of Advanced Technology for Materials Synthesis and Processing, Wuhan University of Technology, Wuhan 430070, China. E-mail: msc@whut.edu.cn.

**Characterization.** X-ray diffraction (XRD) was used to measure the crystal structures.

The morphologies of the developed catalyst were studied by TEM, and high-resolution TEM (HRTEM) and HAADF-STEM images. The elemental valence states of the catalysts were probed by the X-ray photoelectron spectroscopy (XPS) was carried out for chemical composition. For the test details, see our previous reports.

### **Electrochemical Tests**

Electrochemical HER measurements. The electrochemical HER experiments were carried out using a CHI 660E electrochemical workstation (Shanghai, Chenhua Co.) with a standard three electrode system. A graphite rod and Ag/AgCl (3 M KCl) served as the counter electrode and reference electrode, respectively. All the potentials were referenced to a reversible hydrogen electrode (RHE). A glassy carbon electrode (3 mm in diameter) was used in the HER experiments. In 0.5 M H<sub>2</sub>SO<sub>4</sub>, all the potentials were referenced to a reversible hydrogen electrode (RHE) by adding a value of 0.21. In 1.0 M KOH, all the potentials were referenced to a reversible hydrogen electrode (RHE) by adding a value of 1.02.

Electrochemical OER measurements. Electrochemical experiments were performed on an Autolab electrochemical workstation (PGSTAT 302N, Metrohm, Netherlands). The glassy carbon electrode (5 mm in diameter) decorated by the samples were used as the working electrode, while Hg/HgO electrode and platinum sheet were applied as the reference electrode and counter electrode, respectively. Both potentials appearing in this paper transformed to vs RHE (reversible hydrogen electrode) and polarization curves were corrected concerning the iR compensation within the electrolyte. The values of potential vs RHE were calibrated by the  $E_{\text{vs. RHE}} = E_{\text{vs. Hg/HgO}} + 0.098 + 0.0592 \times 13$ . The polarization curves of as-prepared product were recorded at a sweep rate of 5 mV s<sup>-1</sup> in 0.1 M or 1.0 M KOH solution after activation and cyclic stabilizing (a sweep rate of 50 mV s<sup>-1</sup>).

### **Method and Model**

The first principles calculations in the framework of density functional theory,

including structural, electronic performances, were carried out based on the Cambridge Sequential Total Energy Package known as CASTEP.<sup>1</sup> The exchange–correlation functional under the generalized gradient approximation (GGA)<sup>2</sup> with norm-conserving pseudopotentials and Perdew–Burke–Ernzerhof functional was adopted to describe the electron–electron interaction.<sup>3</sup> An energy cutoff of 750 eV was used and a k-point sampling set of 5 x 5 x 1 were tested to be converged. A force tolerance of 0.01 eV Å<sup>-1</sup>, energy tolerance of 5.0x10<sup>-7</sup>eV per atom and maximum displacement of 5.0x10<sup>-4</sup> Å were considered. The surfaces of Co<sub>3</sub>O<sub>4</sub>-P (100) {Co<sub>0.37</sub>S<sub>0.38</sub>P<sub>0.02</sub>} and Co<sub>9</sub>S<sub>8</sub> (311) {Co<sub>9</sub>S<sub>8</sub>} were built with the vacuum space along the z direction is set to be 15 Å, which is enough to avoid interaction between the two neighboring images. The top three atomic layers were relaxed and the bottom three atomic layers were fixed, then the intermediates have been absorbed on the surface of substrates.

Adsorption energy  $\Delta E$  of A group on the surface of substrates was defined as:<sup>4</sup>

$$\Delta E = E_{*A} - (E_{*} + E_A) \quad (1)$$

where \*A and \* denote the adsorption of A group on substrates and the bare substrates,  $E_A$  denotes the energy of A group.

Gibbs free energy change ( $\Delta G$ ) of each chemical reaction is calculated by:

$$\Delta G = \Delta E + \Delta ZPE - T\Delta S \quad (2)$$

where  $E$ ,  $ZPE$ ,  $T$  and  $S$  denote the calculated total energy, zero point energy.

## References

- [1] M. D. Segall, P. J. D. L. M. J. Probert, C. J. Pickard, P. J. Hasnip, S. J. Clark and M. C. Payne, *J. Phys.: Condens. Matter*, **2002**, *14*, 2717.
- [2] J. P. Perdew, K. Burke and M. Ernzerhof, *Phys. Rev. Lett.*, **1996**, *77*, 3865.
- [3] D. R. Hamann, M. Schlüter and C. Chiang, *Phys. Rev. Lett.*, **1979**, *43*, 1494.
- [4] Voiry, D.; Yamaguchi, H.; Li, J.; Silva, R.; Alves, D. C. B.; Fujita, T.; Chen, M. W.; Asefa, T.; Shenoy, V.; Eda, G.; Chhowalla, M. *Nat. Mater.* **2013**, *12*, 850-855.

**Table S1.** The elemental Co, P and S atomic percentage from ICP analysis for different samples

obtained by different phosphorization processes.

| Sample | The amount of phosphorization | Formula                                          |
|--------|-------------------------------|--------------------------------------------------|
| 1      | 0                             | $\text{Co}_9\text{S}_8$                          |
| 2      | 3                             | $\text{Co}_{0.58}\text{S}_{0.73}\text{P}_{0.01}$ |
| 3      | 5                             | $\text{Co}_{0.37}\text{S}_{0.38}\text{P}_{0.02}$ |
| 4      | 8                             | $\text{Co}_{0.70}\text{S}_{0.59}\text{P}_{0.16}$ |

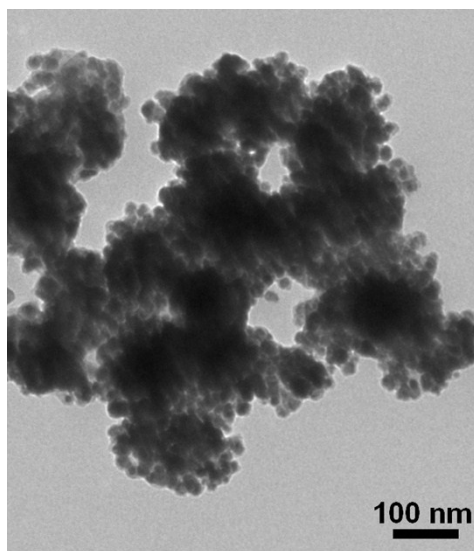

**Fig. S1** TEM image of the as-prepared  $\text{Co}_9\text{S}_8$  NPAs.

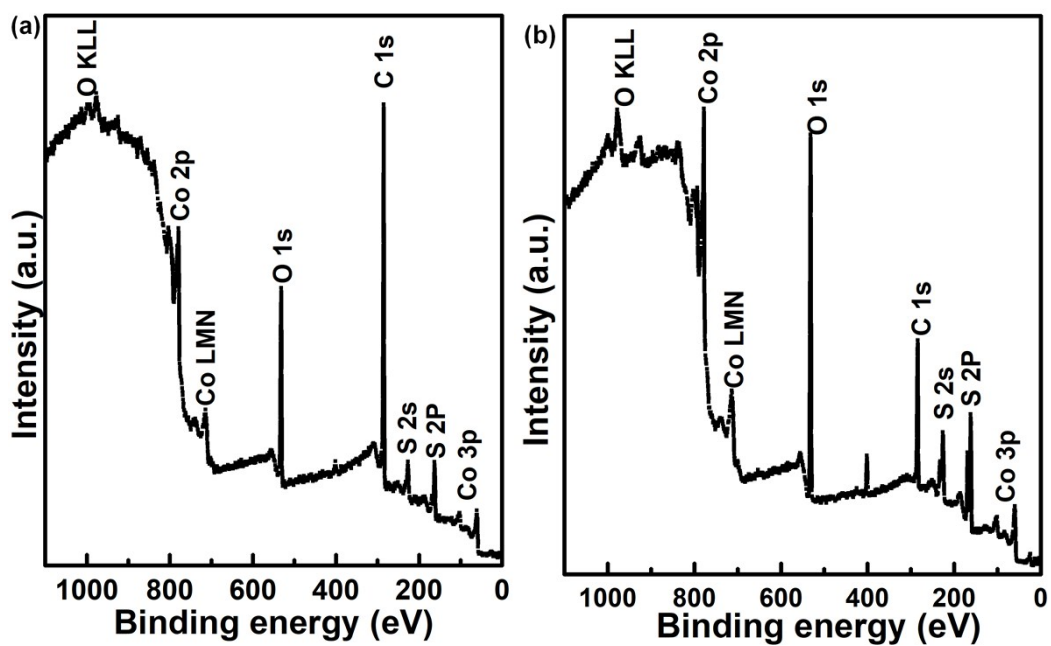

**Fig. S2** XPS survey spectra of the (a)  $\text{Co}_9\text{S}_8$  NPAs and (b) P- $\text{Co}_3\text{S}_4$  ( $\text{Co}_{0.37}\text{S}_{0.38}\text{P}_{0.02}$ ) NSs synthesized under the typical reaction conditions.

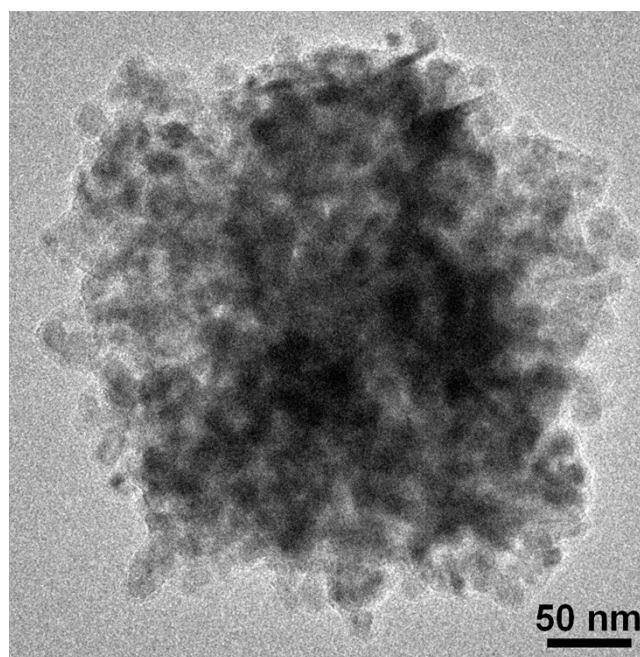

**Fig. S3** High-resolution TEM image of the as-prepared  $\text{Co}_9\text{S}_8$  NPAs.

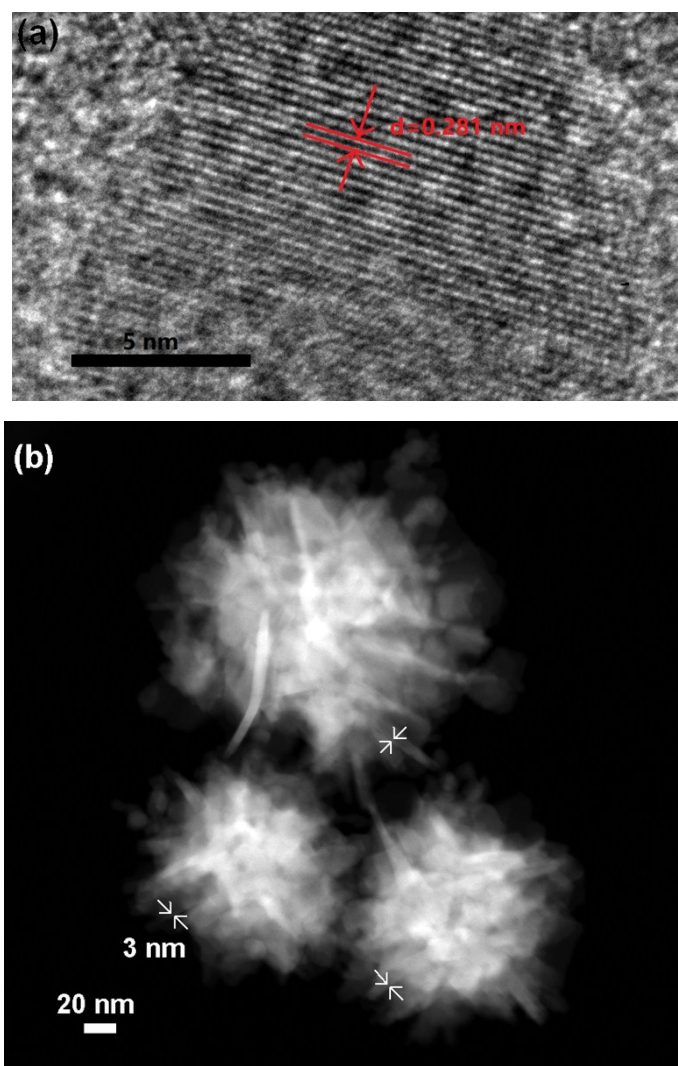

**Fig. S4** (a) HRTEM image of the as-prepared  $\text{Co}_9\text{S}_8$  NPAs. (b) HAADF-STEM image of  $\text{Co}_{0.37}\text{S}_{0.38}\text{P}_{0.02}$ .

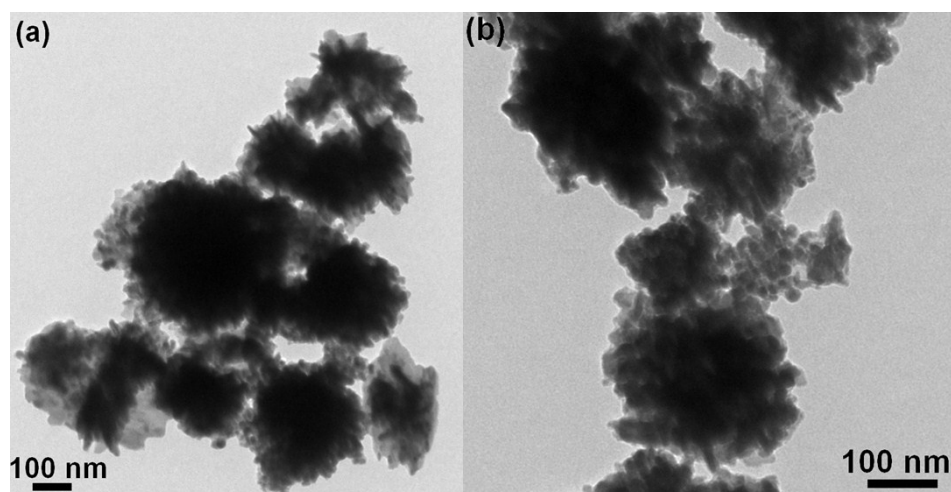

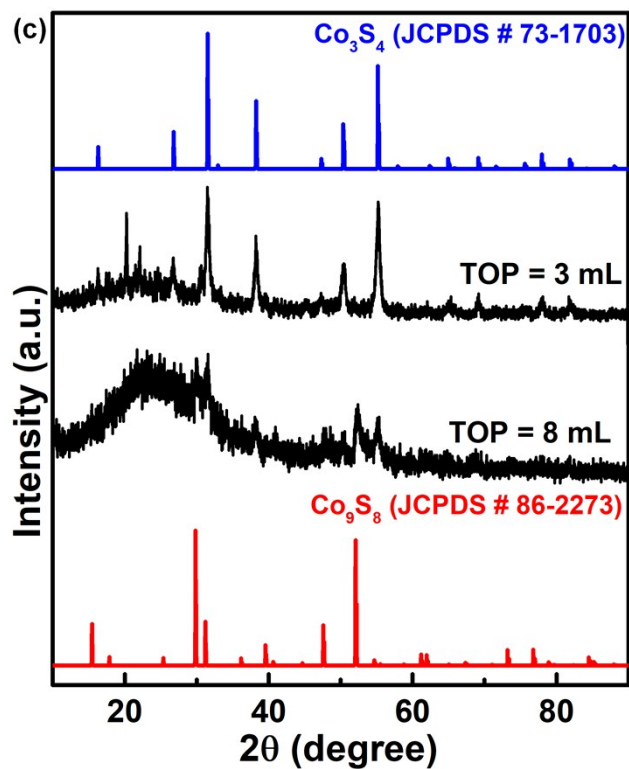

**Fig. S5** Phase and morphology of the cobalt monophosphosulfides. TEM images of (a)  $\text{Co}_{0.58}\text{S}_{0.73}\text{P}_{0.01}$  and (b)  $\text{Co}_{0.70}\text{S}_{0.59}\text{P}_{0.16}$ . (c) XRD pattern.

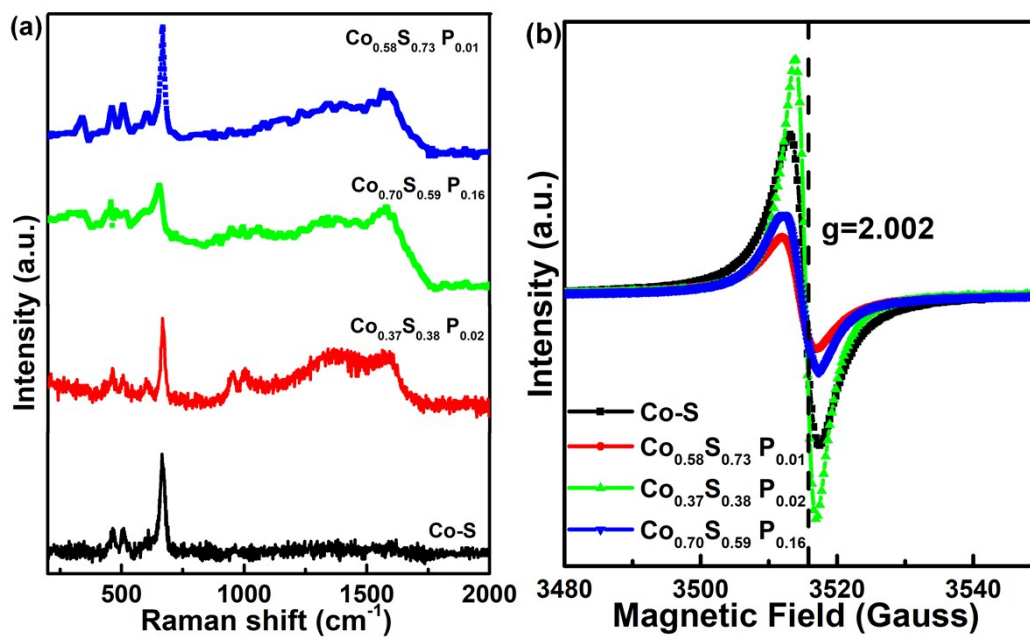

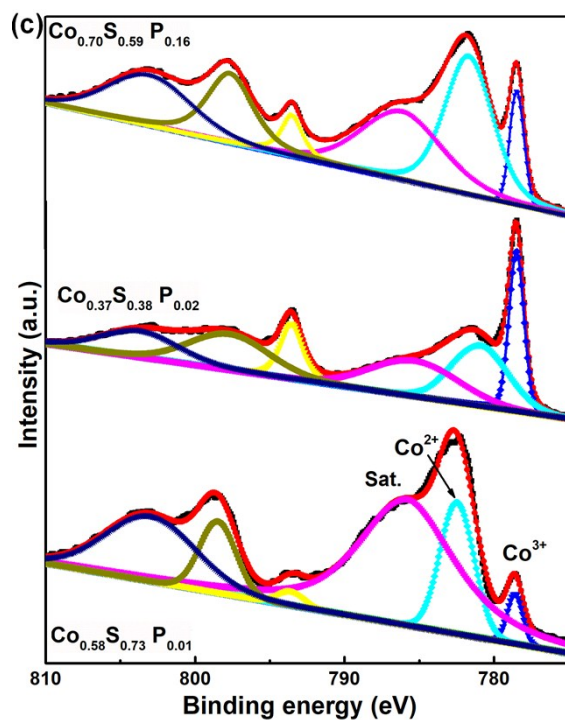

**Fig. S6** (a) Raman spectra, (b) room-temperature EPR spectra, and (c) Co 2p XPS spectra of cobalt monophosphosulfides.

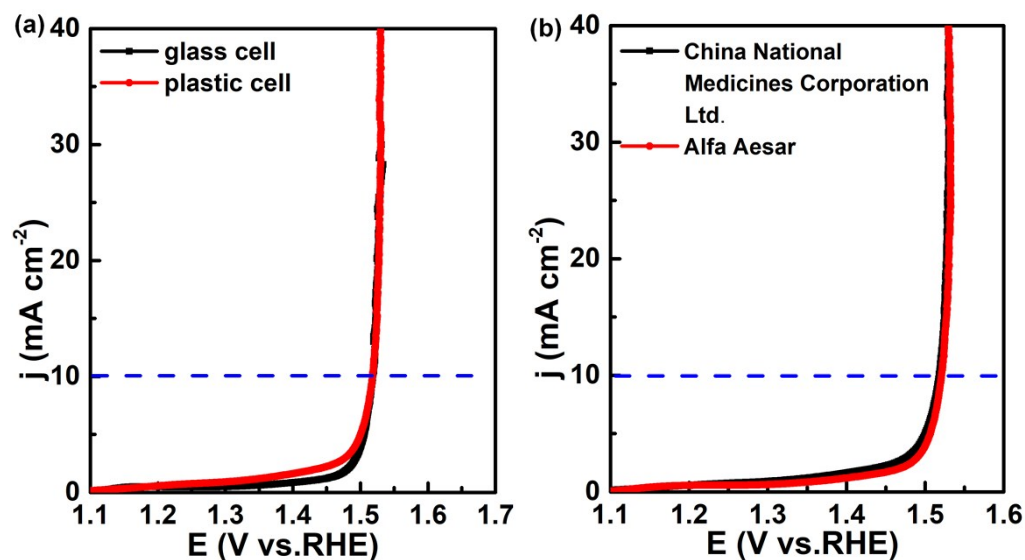

**Fig. S7** (a) Polarization curves of  $\text{Co}_{0.37}\text{S}_{0.38}\text{P}_{0.02}$  in 0.1 M KOH solution in a glass cell and plastic cell, respectively, at a scan rate of  $5 \text{ mV s}^{-1}$ . (b) Polarization curves of  $\text{Co}_{0.37}\text{S}_{0.38}\text{P}_{0.02}$  in 0.1 M KOH solutions (Alfa Aesar and China National Medicines Corporation Ltd.) in plastic cells at a scan rate of  $5 \text{ mV s}^{-1}$ .



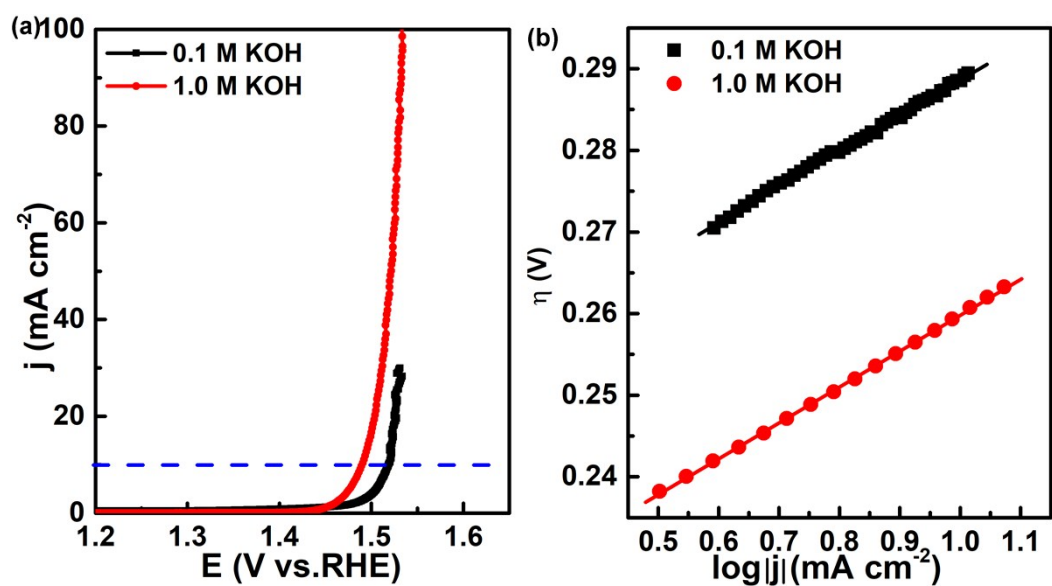

Fig. S8 (a) Polarization curves of  $\text{Co}_{0.37}\text{S}_{0.38}\text{P}_{0.02}$  in 0.1 M KOH and 1.0 M KOH at a scan rate of 5 mV s<sup>-1</sup>. (b) Corresponding Tafel plots.

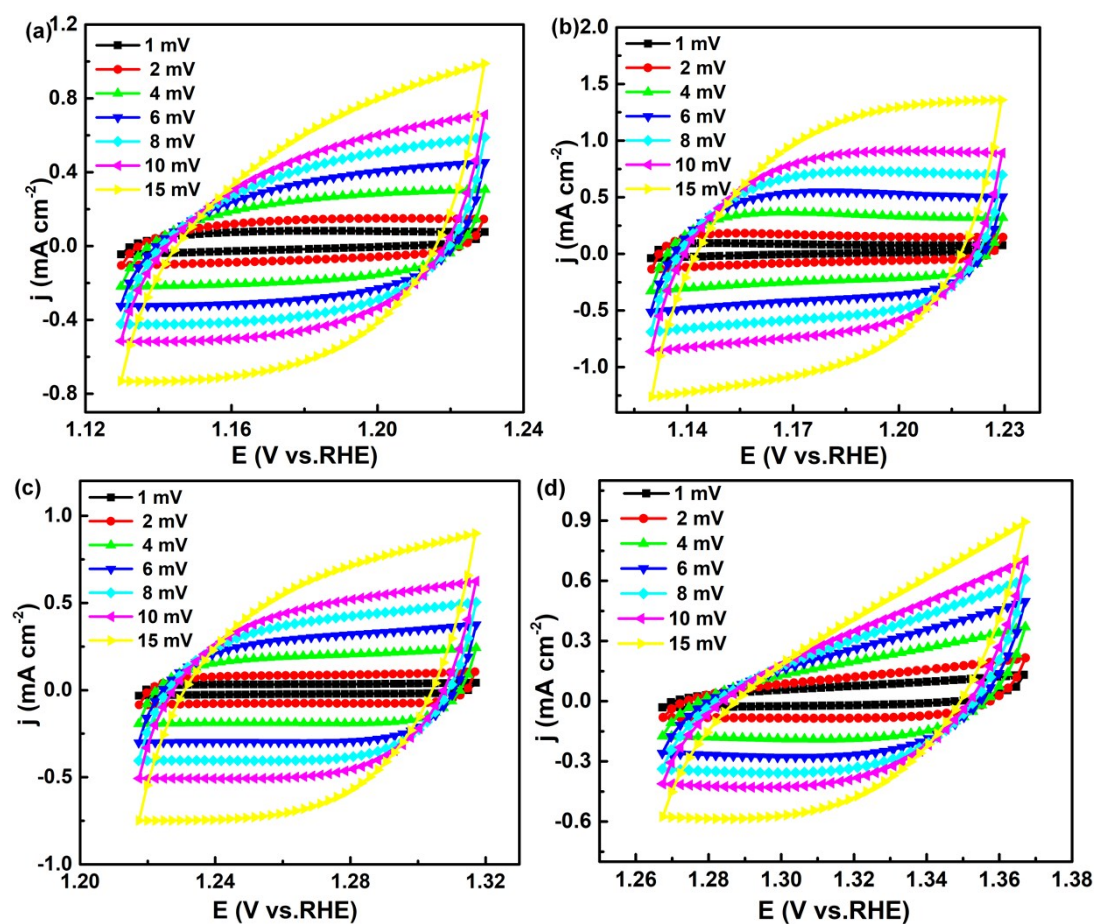

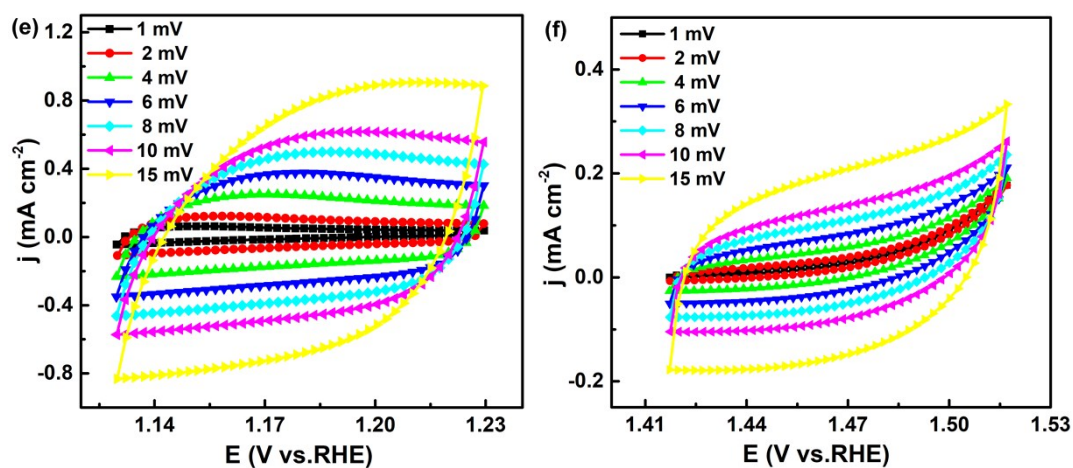

**Fig. S9** CV curves of (a) Co<sub>0.58</sub>S<sub>0.73</sub>P<sub>0.01</sub>, (b) Co<sub>0.37</sub>S<sub>0.38</sub>P<sub>0.02</sub>, (c) Co<sub>0.70</sub>S<sub>0.59</sub>P<sub>0.16</sub>, (d) Co-S, (e) Co-P, and (f) Co<sub>3</sub>O<sub>4</sub> electrodes.

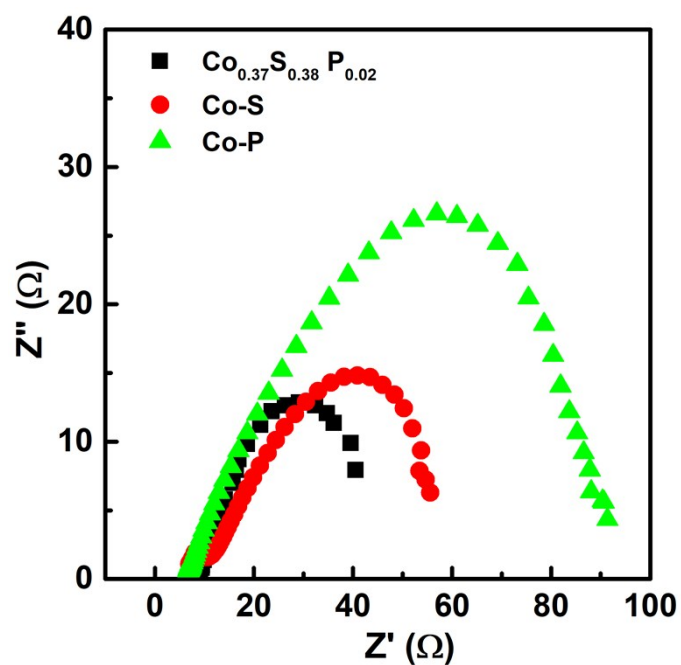

**Fig. S10** the electrochemical impedance plots obtained at a potential of 1.63 V vs. RHE.

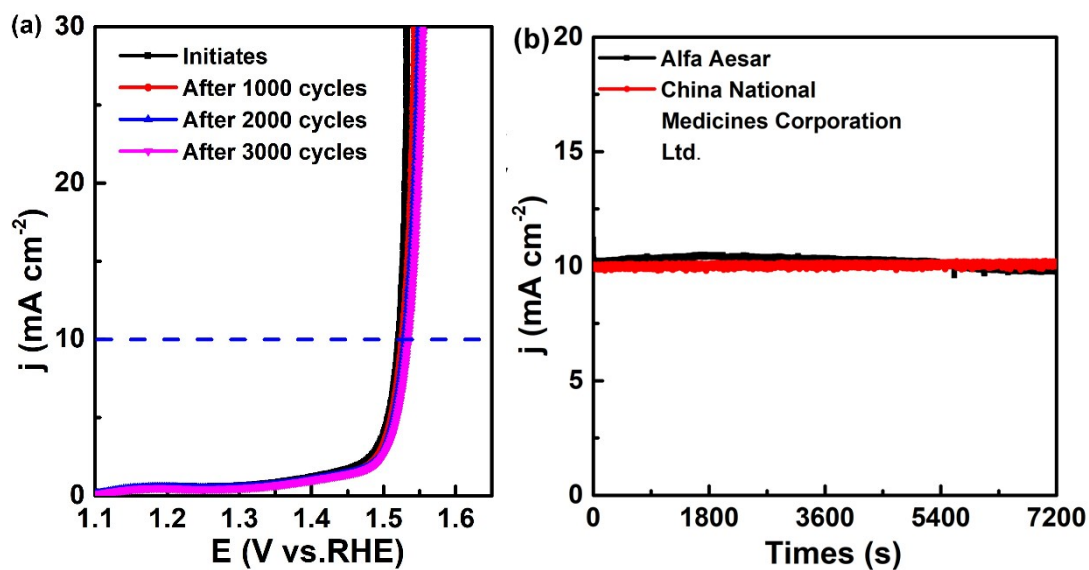

**Fig. S11** (a) Polarization data for the  $\text{Co}_{0.37}\text{S}_{0.38}\text{P}_{0.02}$  sample in 0.1 M KOH initially and after 1000, 2000, and 3000 CV sweeps between +1.1 and +1.6 V vs RHE in a 0.1 M KOH solution (Alfa Aesar) in a plastic cell. (b) The chronoamperometric curves of  $\text{Co}_{0.37}\text{S}_{0.38}\text{P}_{0.02}$  at  $\eta_{10}$  (Alfa Aesar or China National Medicines Corporation Ltd.) in a 0.1 M KOH solution in a plastic cell.

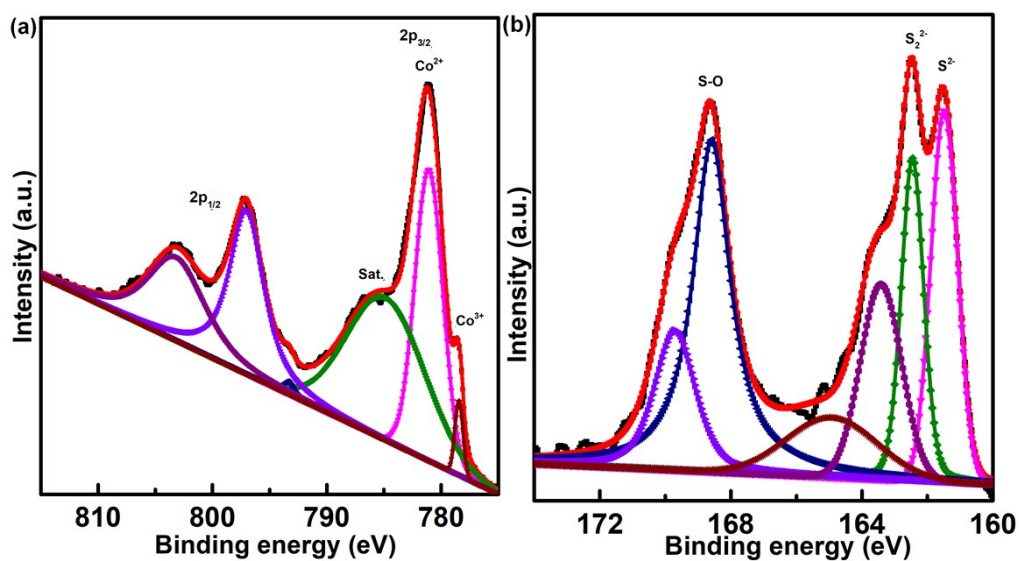

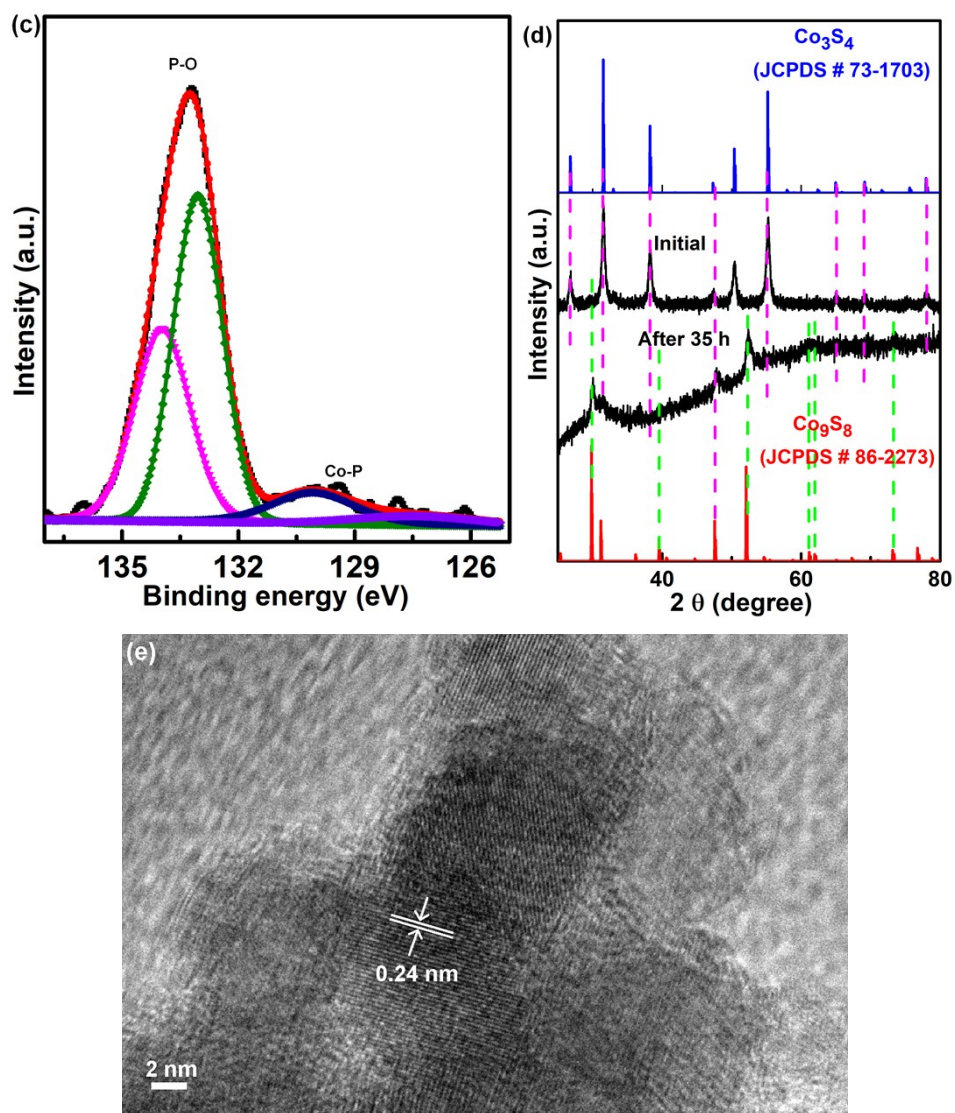

**Fig. S12** XPS spectra of as-synthesized pyrite-structured  $\text{Co}_{0.37}\text{S}_{0.38}\text{P}_{0.02}$  after the OER properties in 0.1 M KOH, (a) Co 2p, (b) S 2p, and (c) P 2p XPS spectra, respectively. (d) XRD pattern and (e) HRTEM image of  $\text{Co}_{0.37}\text{S}_{0.38}\text{P}_{0.02}$  after the OER properties.

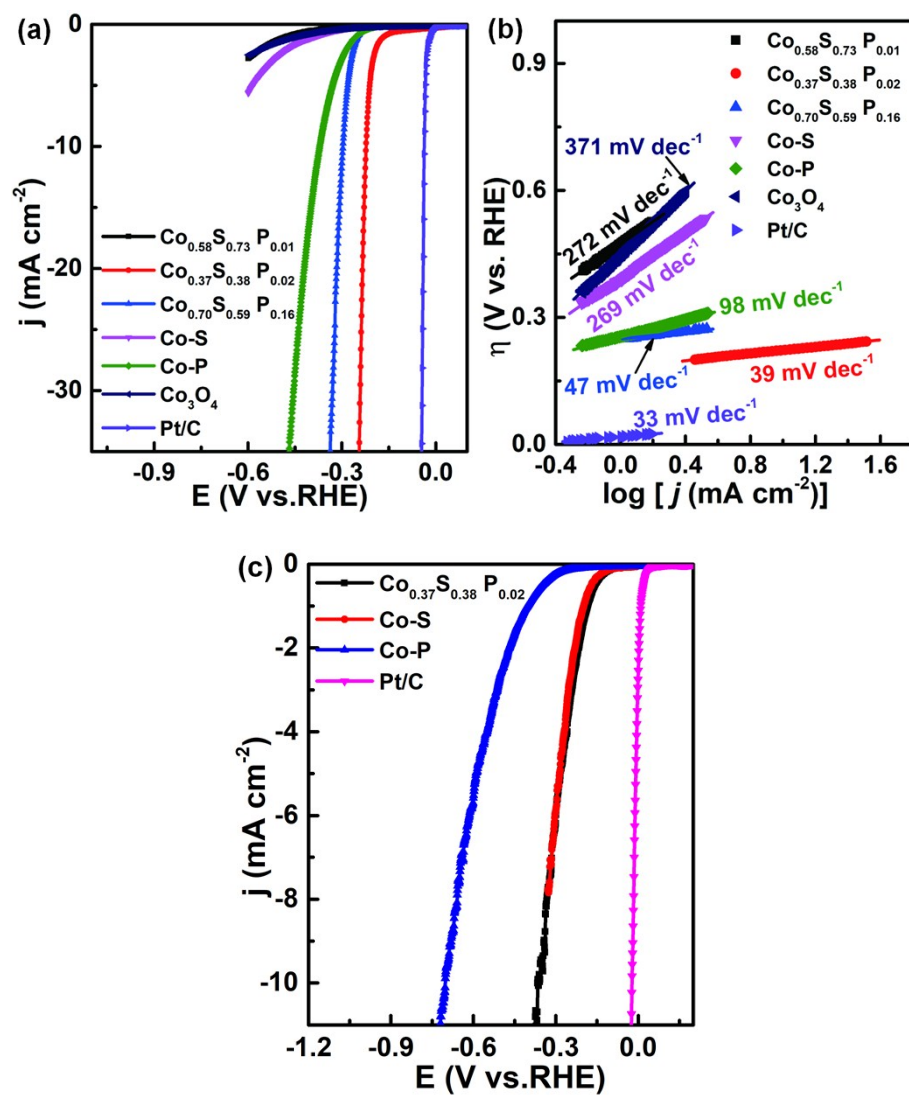

**Fig. S13** (a) Polarization curves and (b) Tafel plots in 0.5 M H<sub>2</sub>SO<sub>4</sub>. (c) Polarization curves in 1.0 M PBS solution.



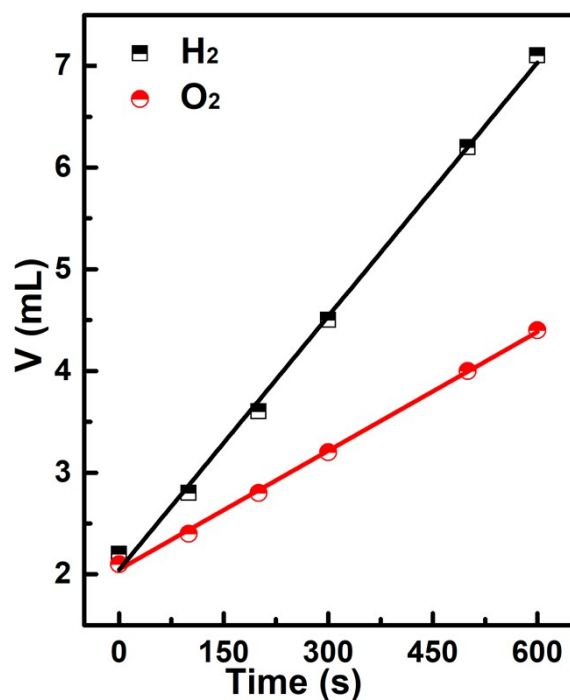

**Fig. S14** the faradaic efficiency of  $\text{Co}_{0.37}\text{S}_{0.38}\text{P}_{0.02}$ .

**Table S2.** ICP analysis of KOH from Alfa Aesar and China National Medicines Corporation Ltd.

| Alfa Aesar |    |        |      | China National Medicines Corporation Ltd. | element content unit |        |      |
|------------|----|--------|------|-------------------------------------------|----------------------|--------|------|
|            | K  | 3402.7 | mg/L |                                           | K                    | 3424.3 | mg/L |
|            | Na | 26.318 | mg/L |                                           | Na                   | 30.894 | mg/L |
|            | Si | 0.3577 | mg/L |                                           | Si                   | 1.0822 | mg/L |
|            | W  | 0.1152 | mg/L |                                           | W                    | 0.1864 | mg/L |
|            | Sn | 0.0649 | mg/L |                                           | Ca                   | 0.1309 | mg/L |
|            | Al | 0.0475 | mg/L |                                           | Al                   | 0.1070 | mg/L |
|            | P  | 0.0199 | mg/L |                                           | Sn                   | 0.0852 | mg/L |
|            | Ta | 0.0193 | mg/L |                                           | Ba                   | 0.0488 | mg/L |
|            | Ba | 0.0154 | mg/L |                                           | P                    | 0.0177 | mg/L |
|            | Mo | 0.0142 | mg/L |                                           | B                    | 0.0176 | mg/L |
|            | Sb | 0.0132 | mg/L |                                           | Mo                   | 0.0174 | mg/L |
|            | Se | 0.0122 | mg/L |                                           | As                   | 0.0165 | mg/L |
|            | Co | 0.0073 | mg/L |                                           | Ta                   | 0.0164 | mg/L |
|            | Tl | 0.0062 | mg/L |                                           | Hg                   | 0.0152 | mg/L |
|            | Au | 0.0055 | mg/L |                                           | Sb                   | 0.0121 | mg/L |
|            | Ca | 0.0052 | mg/L |                                           | Pt                   | 0.0114 | mg/L |
|            | Ir | 0.0047 | mg/L |                                           | Nb                   | 0.0101 | mg/L |
|            | Pr | 0.0041 | mg/L |                                           | Fe                   | 0.0090 | mg/L |
|            | Sm | 0.0039 | mg/L |                                           | Se                   | 0.0060 | mg/L |
|            | Ge | 0.0039 | mg/L |                                           | Co                   | 0.0054 | mg/L |
|            | B  | 0.0034 | mg/L |                                           | Ni                   | 0.0053 | mg/L |

|    |        |      |    |        |      |
|----|--------|------|----|--------|------|
| Fe | 0.0031 | mg/L | Pb | 0.0053 | mg/L |
| Ga | 0.0031 | mg/L | Tl | 0.0041 | mg/L |
| Zn | 0.0030 | mg/L | Pr | 0.0040 | mg/L |
| Pt | 0.0029 | mg/L | Sm | 0.0035 | mg/L |
| S  | 0.0029 | mg/L | Sr | 0.0032 | mg/L |
| Mg | 0.0029 | mg/L | Nd | 0.0027 | mg/L |
| Pb | 0.0024 | mg/L | Ga | 0.0026 | mg/L |
| Cu | 0.0023 | mg/L | Te | 0.0025 | mg/L |
| Hf | 0.0022 | mg/L | Li | 0.0025 | mg/L |
| In | 0.0022 | mg/L | Cr | 0.0024 | mg/L |
| Cr | 0.0021 | mg/L | Mg | 0.0024 | mg/L |
| Nd | 0.0017 | mg/L | In | 0.0020 | mg/L |
| Y  | 0.0015 | mg/L | S  | 0.0018 | mg/L |
| Ce | 0.0014 | mg/L | Hf | 0.0016 | mg/L |
| As | 0.0014 | mg/L | Y  | 0.0015 | mg/L |
| Te | 0.0013 | mg/L | Ti | 0.0015 | mg/L |
| Mn | 0.0013 | mg/L | Bi | 0.0014 | mg/L |
| Be | 0.0012 | mg/L | Lu | 0.0014 | mg/L |
| Ru | 0.0012 | mg/L | Ru | 0.0014 | mg/L |
| Eu | 0.0012 | mg/L | Zn | 0.0013 | mg/L |
| Sr | 0.0011 | mg/L | Be | 0.0012 | mg/L |
| Ti | 0.0011 | mg/L | Au | 0.0012 | mg/L |
| Rh | 0.0011 | mg/L | Gd | 0.0012 | mg/L |
| Lu | 0.0011 | mg/L | Tb | 0.0012 | mg/L |
| Nb | 0.0010 | mg/L | Ge | 0.0012 | mg/L |
| Er | 0.0009 | mg/L | Mn | 0.0011 | mg/L |
| Li | 0.0008 | mg/L | Zr | 0.0011 | mg/L |
| Hg | 0.0007 | mg/L | Eu | 0.0011 | mg/L |
| Sc | 0.0007 | mg/L | Pd | 0.0009 | mg/L |
| Bi | 0.0007 | mg/L | Cu | 0.0008 | mg/L |
| Ho | 0.0006 | mg/L | Rh | 0.0007 | mg/L |
| Gd | 0.0006 | mg/L | Dy | 0.0007 | mg/L |
| Ag | 0.0006 | mg/L | Sc | 0.0007 | mg/L |
| Yb | 0.0004 | mg/L | V  | 0.0006 | mg/L |
| Tm | 0.0004 | mg/L | Tm | 0.0005 | mg/L |
| V  | 0.0004 | mg/L | Ce | 0.0005 | mg/L |
| Pd | 0.0004 | mg/L | Ir | 0.0004 | mg/L |
| Zr | 0.0003 | mg/L | Cd | 0.0004 | mg/L |
| Dy | 0.0003 | mg/L | Yb | 0.0003 | mg/L |
| Tb | 0.0002 | mg/L | Ho | 0.0001 | mg/L |
| Cd | 0.0002 | mg/L | Ag | 0.0001 | mg/L |
| La | 0.0001 | mg/L | Er | 0.0001 | mg/L |
| Ni | 0.0001 | mg/L | La | 0.0001 | mg/L |

**Table S3.** Comparison of OER activities of metal sulfides and phosphides catalysts in alkaline condition.

| Materials                                                        | $\eta_{10}$<br>(mV) | Electrolyte | Tafel slope<br>(mV dec <sup>-1</sup> ) | Ref.                                              |
|------------------------------------------------------------------|---------------------|-------------|----------------------------------------|---------------------------------------------------|
| Co <sub>0.37</sub> S <sub>0.38</sub> P <sub>0.02</sub> NSs       | 288                 | 0.1 M KOH   | 43.4                                   | This work                                         |
| Co <sub>0.37</sub> S <sub>0.38</sub> P <sub>0.02</sub> NSs       | 257                 | 1.0 M KOH   | 44.0                                   | This work                                         |
| CoP                                                              | 320                 | 1.0 M KOH   | 71                                     | <i>ACS Catal.</i> 2015, 5, 6874.                  |
| NiMoP <sub>2</sub>                                               | 330                 | 1.0 M KOH   | 90.6                                   | <i>J. Mater. Chem. A</i> 2017, 5, 7191.           |
| CoS <sub>4.6</sub> O <sub>0.6</sub>                              | 290                 | 1.0 M KOH   | 67                                     | <i>Angew. Chem. Int. Ed.</i> 2017, 56, 4858-4861  |
| Co <sub>3</sub> S <sub>4</sub> nanosheets                        | 355                 | 1.0 M KOH   | 48                                     | <i>Angew. Chem. Int. Ed.</i> 2015, 54, 11231.     |
| CoP <sub>3</sub> /NAs/CFP                                        | 334                 | 1.0 M KOH   | 62                                     | <i>J. Mater. Chem. A</i> 2016, 4, 14539.          |
| CoS <sub>2</sub> (400)/N,S-GO                                    | 390                 | 0.1 M KOH   | 75                                     | <i>ACS Catal.</i> 2015, 5, 3625.                  |
| N-Co <sub>9</sub> S <sub>8</sub> /graphene hybrid                | 409                 | 1.0 M KOH   | 82.7                                   | <i>Energy Environ. Sci.</i> 2016, 9, 1320.        |
| Co <sub>3</sub> S <sub>4</sub> @MoS <sub>2</sub>                 | 280                 | 1.0 M KOH   | 43                                     | <i>Nano Energy</i> 2018, 47, 494.                 |
| CoP NR/C                                                         | 360                 | 0.1 M KOH   | 66                                     | <i>ACS Catal.</i> 2015, 5, 4066.                  |
| Co@MoS <sub>2</sub>                                              | 270                 | 1.0 M KOH   | 74                                     | <i>Nanoscale</i> 2017, 9, 2711.                   |
| Co/Co <sub>2</sub> P                                             | 390                 | 1.0 M KOH   | 59.8                                   | <i>ACS Energy Lett.</i> 2016, 1, 1192.            |
| Co <sub>0.9</sub> S <sub>0.58</sub> P <sub>0.42</sub>            | 266                 | 1.0 M KOH   | 48                                     | <i>ACS Nano</i> 2017, 11, 11031-11040.            |
| Co/Co <sub>x</sub> M <sub>y</sub>                                | 334                 | 1.0 M KOH   | /                                      | <i>Small</i> 2019, 12, 1901518.                   |
| Co-P film                                                        | 345                 | 1.0 M KOH   | 47                                     | <i>Angew. Chem. Int. Ed.</i> 2015, 54, 6251.      |
| Se/Ni-Co <sub>3</sub> O <sub>4</sub>                             | 290                 | 1.0 M KOH   | 62.9                                   | <i>ACS Sustainable Chem. Eng.</i> 2019, 7, 11901. |
| Co <sub>x</sub> Ni <sub>1-x</sub> Fe <sub>2</sub> O <sub>4</sub> | 381                 | 1.0 M KOH   | 46.4                                   | <i>ACS Appl. Mater. Interfaces</i> 2017, 9,       |





**Table S4.** Comparison of HER activities of metal sulfides and phosphides catalysts in 1.0 M KOH.

| Materials                                                  | $\eta_{10}$<br>(mV) | Tafel slope<br>(mV dec <sup>-1</sup> ) | Stability<br>(h) | Ref.                                                                                                                         |
|------------------------------------------------------------|---------------------|----------------------------------------|------------------|------------------------------------------------------------------------------------------------------------------------------|
| Co <sub>0.37</sub> S <sub>0.38</sub> P <sub>0.02</sub> NSs | 218                 | 103                                    | 35               | This work                                                                                                                    |
| Ni <sub>9</sub> S <sub>8</sub>                             | 230                 | 123                                    | 24               | <i>Adv. Funct. Mater.</i> 2016, 26, 3314.                                                                                    |
| PNC/Co                                                     | 298                 | 131                                    | 10               | <i>J. Mater. Chem. A</i> 2016, 4, 3204.                                                                                      |
| MoS <sub>2</sub> /NiS                                      | 244                 | 97                                     | 12               | <i>Small</i> 2018, 1803639.                                                                                                  |
| CoS <sub>x</sub> /Ni <sub>3</sub> S <sub>2</sub> @NF       | 204                 | 133.32                                 | 20               | <i>ACS Appl. Mater. Interfaces</i> 2018,<br>1033, 27712.                                                                     |
| Co-Fe binary oxide<br>composite                            | 220                 | 51                                     |                  | <i>Catal. Today</i> 2019,<br><a href="https://doi.org/10.1016/j.cattod.2019.01.060">doi.org/10.1016/j.cattod.2019.01.060</a> |
| MoS <sub>2</sub> -3                                        | 201                 | 118                                    | 24               | <i>Chem. Eur. J.</i> 2018, 24, 19075.                                                                                        |
| FeP nanorod<br>arrays/carbon cloth                         | 218                 | 146                                    | 20               | <i>ACS Catal.</i> 2014, 4, 4065.                                                                                             |
| CoP/CC                                                     | 209                 | 129                                    | 22               | <i>J. Am. Chem. Soc.</i> 2014, 136, 7587.                                                                                    |
| NiMo MT/NF                                                 | 119                 | 119                                    | 10               | <i>Int. J. Hydrogen Energy</i> 2019, 44,<br>24712.                                                                           |
| CoS <sub>1.097</sub> /MoS <sub>2</sub>                     | 249                 | 75                                     | 21               | <i>ACS Appl. Energy Mater.</i> 2019, 2,<br>10, 7504.                                                                         |
| MoS <sub>2</sub> /CNT-<br>graphene                         | 255                 | 100                                    |                  | <i>Nat. Mater.</i> 2016, 15, 1003.                                                                                           |

|                                      |     |       |    |                                                        |
|--------------------------------------|-----|-------|----|--------------------------------------------------------|
| Ni@C 400 NSs                         | 270 | 143   |    | <i>J. Mater. Chem. A.</i> 2017, 5, 17954.              |
| NiCo <sub>2</sub> S <sub>4</sub> /NF | 248 | 113.7 | 12 | <i>ACS Appl. Mater. Interfaces.</i> 2017,<br>9, 15364. |

**Table S5.** Overall water splitting activity comparison for catalysts in this work with previously reported ones in alkaline solution.

| Materials                                                              | Voltage (V) at<br>10 mA cm <sup>-2</sup> | Electrolyte | Substrate                                   | Ref.                                                |
|------------------------------------------------------------------------|------------------------------------------|-------------|---------------------------------------------|-----------------------------------------------------|
| Co <sub>0.37</sub> S <sub>0.38</sub> P <sub>0.02</sub> NS <sub>S</sub> | 1.59                                     | 1.0 M KOH   | Ni foam                                     | This work                                           |
| Pt/C-RuO <sub>2</sub>                                                  | 1.63                                     | 1.0 M KOH   | Ni foam                                     | <i>ACS Appl. Mater. Interfaces</i> 2019, 11, 6890.  |
| P <sub>8.6</sub> -Co <sub>3</sub> O <sub>4</sub> /NF                   | 1.63                                     | 1.0 M KOH   | Ni foam                                     | <i>ACS Catal.</i> 2018, 8, 2236.                    |
| Pt/C-IrO <sub>2</sub>                                                  | 1.58                                     | 1.0 M KOH   | Ni foam                                     | <i>Adv. Energy Mater.</i> 2017, 7, 1602122.         |
| Co <sub>x</sub> PO <sub>4</sub> /CoP                                   | 1.91                                     | 1.0 M KOH   | - -                                         | <i>Adv. Mater.</i> 2015, 27, 3175.                  |
| NiCo <sub>2</sub> O <sub>4</sub>                                       | 1.65                                     | 1.0 M NaOH  | Ni foam                                     | <i>Angew. Chem. Int. Ed.</i> 2016, 55, 6290.        |
| Co@Co <sub>3</sub> O <sub>4</sub> -NC                                  | 2.00                                     | 1.0 M KOH   | Ni foam                                     | <i>J. Mater. Chem. A</i> 2017, 5, 9533.             |
| p-CoSe <sub>2</sub> /CC                                                | 1.62                                     | 1.0 M KOH   | Ni foam                                     | <i>ACS Sustainable Chem. Eng.</i> 2018, 6, 15374.   |
| Co-P                                                                   | 1.65                                     | 1.0 M KOH   | Cu foil                                     | <i>Angew. Chem., Int. Ed.</i> 2015, 54, 6251.       |
| NiS/Ni <sub>2</sub> P/CC                                               | 1.67                                     | 1.0 M KOH   | carbon cloth                                | <i>ACS Appl. Mater. Interfaces</i> 2018, 105, 4689. |
| CoP@NPCP                                                               | 1.66                                     | 1.0 M KOH   | carbon paper                                | <i>Carbon</i> 2019, 150, 446.                       |
| CoPS                                                                   | 1.75                                     | 1.0 M KOH   | Al <sub>2</sub> O <sub>3</sub> -3 electrode | <i>ACS Sustainable Chem. Eng.</i> 2018, 68, 10087.  |
| P-Co-Ni-S/NF                                                           | 1.60                                     | 1.0 M KOH   | Ni foam                                     | <i>ACS Appl. Mater. Interfaces</i> 2018, 108, 7087. |
